# Supplementary material
Source: PubMed Central journal article supplement (PMC8384678)
Supplement: NIHMS1716909-supplement-1.pdf [file NIHMS1716909-supplement-1.pdf]

| <b>Table S1. Summary of Key Variables by Quartiles of Factor Scores</b> |            |            |            |              |
|-------------------------------------------------------------------------|------------|------------|------------|--------------|
| <b>Factor Scores</b>                                                    | <b>Q1</b>  | <b>Q2</b>  | <b>Q3</b>  | <b>Q4</b>    |
| <b>Tubule Injury/Repair Score</b>                                       |            |            |            |              |
| Age, years (SD)                                                         | 71 (9)     | 74 (9)     | 74 (9)     | 74 (9)       |
| Female, n (%)                                                           | 94 (16)    | 156 (27)   | 254 (44)   | 421 (73)     |
| Race, n (%)                                                             |            |            |            |              |
| Non-Hispanic White                                                      | 423 (73)   | 443 (77)   | 424 (74)   | 391 (68)     |
| Non-Hispanic Black                                                      | 147 (26)   | 126 (22)   | 144 (25)   | 170 (30)     |
| Hispanic and other                                                      | 6 (1)      | 7 (1)      | 8 (1)      | 14 (2)       |
| Intensive arm, n (%)                                                    | 295 (51)   | 290 (50)   | 292 (51)   | 300 (52)     |
| Mean baseline SBP, mm Hg (SD)                                           | 137 (15)   | 139 (16)   | 141 (16)   | 142 (17)     |
| Mean baseline # BP meds, n (SD)                                         | 2.2 (0.96) | 2.1 (1.0)  | 2.1 (1.0)  | 2.2 (1.0)    |
| Mean eGFR, ml/min/1.73m <sup>2</sup> (SD)                               | 46 (10)    | 47 (10)    | 46 (11)    | 45 (11)      |
| Median urine ACR, mg/g (IQR)                                            | 10 [5, 32] | 13 [6, 40] | 15 [7, 44] | 24 [11, 81]  |
| <b>Tubule Injury/Fibrosis Score</b>                                     |            |            |            |              |
| Age, years (SD)                                                         | 71 (9)     | 73 (9)     | 74 (9)     | 75 (9)       |
| Female, n (%)                                                           | 238 (41)   | 219 (38)   | 224 (39)   | 244 (42)     |
| Race, n (%)                                                             |            |            |            |              |
| Non-Hispanic White                                                      | 375 (65)   | 403 (70)   | 443 (77)   | 460 (80)     |
| Non-Hispanic Black                                                      | 194 (34)   | 165 (29)   | 122 (21)   | 106 (18)     |
| Hispanic and other                                                      | 7 (1)      | 8 (1)      | 11 (2)     | 9 (2)        |
| Intensive arm, n (%)                                                    | 303 (53)   | 290 (50)   | 284 (49)   | 300 (52)     |
| Mean baseline SBP, mm Hg (SD)                                           | 139 (16)   | 140 (16)   | 139 (16)   | 141 (18)     |
| Mean baseline # BP meds, n (SD)                                         | 2.2 (1.0)  | 2.2 (1.0)  | 2.1 (1.0)  | 2.1 (1.0)    |
| Mean eGFR, ml/min/1.73m <sup>2</sup> (IQR)                              | 46 (10)    | 46 (10)    | 46 (10)    | 45 (11)      |
| Median urine ACR, mg/g (IQR)                                            | 11 [5, 29] | 13 [6, 37] | 16 [8, 64] | 21 [10, 71]  |
| <b>Tubule Reabsorption Score</b>                                        |            |            |            |              |
| Age, years (SD)                                                         | 71 (8)     | 73 (9)     | 74 (9)     | 74 (10)      |
| Female, n (%)                                                           | 251 (44)   | 251 (44)   | 216 (38)   | 207 (36)     |
| Race, n (%)                                                             |            |            |            |              |
| Non-Hispanic White                                                      | 380 (66)   | 425 (74)   | 444 (77)   | 432 (75)     |
| Non-Hispanic Black                                                      | 190 (33)   | 142 (25)   | 124 (22)   | 131 (23)     |
| Hispanic and other                                                      | 6 (1)      | 9 (2)      | 8 (1)      | 12 (2)       |
| Intensive arm, n (%)                                                    | 289 (50)   | 298 (52)   | 298 (52)   | 292 (51)     |
| Mean baseline SBP, mm Hg (SD)                                           | 136 (15)   | 139 (15)   | 141 (16)   | 144 (17)     |
| Mean baseline # BP meds, n (SD)                                         | 2.1 (1.0)  | 2.2 (1.0)  | 2.1 (1.0)  | 2.2 (1.1)    |
| Mean eGFR, ml/min/1.73m <sup>2</sup> (IQR)                              | 49 (8)     | 48 (9)     | 46 (10)    | 40 (12)      |
| Median urine ACR, mg/g (IQR)                                            | 8 [5, 16]  | 11 [6, 29] | 16 [7, 54] | 45 [16, 147] |
| <b>Tubule Reseve Score</b>                                              |            |            |            |              |
| Age, years (SD)                                                         | 74 (9)     | 74 (9)     | 73 (9)     | 72 (10)      |
| Female, n (%)                                                           | 260 (45)   | 220 (38)   | 215 (37)   | 230 (40)     |
| Race, n (%)                                                             |            |            |            |              |
| Non-Hispanic White                                                      | 479 (83)   | 453 (79)   | 408 (71)   | 341 (59)     |
| Non-Hispanic Black                                                      | 87 (15)    | 113 (20)   | 163 (28)   | 224 (39)     |
| Hispanic and other                                                      | 10 (2)     | 10 (2)     | 5 (1)      | 10 (2)       |
| Intensive arm, n (%)                                                    | 318 (55)   | 283 (49)   | 275 (48)   | 301 (52)     |
| Mean baseline SBP, mm Hg (SD)                                           | 140 (15)   | 140 (17)   | 140 (17)   | 138 (16)     |
| Mean baseline # BP meds, n (SD)                                         | 2.0 (1.0)  | 2.1 (1.0)  | 2.1 (1.0)  | 2.4 (1.0)    |
| Mean eGFR, ml/min/1.73m <sup>2</sup> (IQR)                              | 51 (7)     | 49 (8)     | 45 (10)    | 38 (12)      |
| Median urine ACR, mg/g (IQR)                                            | 10 [6, 21] | 13 [6, 39] | 17 [7, 59] | 24 [11, 111] |

| <b>Table S2. Interactions of Factor Scores with Randomization Arm on Risk of AKI</b> |                     |
|--------------------------------------------------------------------------------------|---------------------|
| Factor Score                                                                         | Interaction p-value |
| Tubule Injury/Repair<br>(NGAL, IL-18, and YKL-40)                                    | 0.91                |
| Tubule Injury/Fibrosis<br>(KIM-1 and MCP-1)                                          | 0.61                |
| Tubule Reabsorption<br>( $\alpha$ 1m, $\beta$ 2m)                                    | 0.67                |
| Tubule Reserve/Mineral Metabolism<br>(UMOD, iPTH, iFGF23)                            | 0.31                |
| Albumin-creatinine ratio                                                             | 0.35                |

\*Adjusted for age, sex, race, randomization arm, SBP, DBP, number of antihypertensive meds, ACEi or ARB use, diuretic use, history of CVD or HF, current smoker, BMI, LDL, total cholesterol, baseline eGFR and UACR  
Each factor is modeled per SD higher. ACR was log transformed and represents a SD higher on the log scale, to provide a reference for comparison of strengths of association.

**Table S3. Association of Factor Scores with 50% kidney function decline or ESRD or Transplantation**

| <b>Incident events = 82</b>       | <b>Unadjusted<br/>β (95% CI)</b> | <b>Model 1*<br/>β (95% CI)</b> | <b>Model 2**<br/>β (95% CI)</b> |
|-----------------------------------|----------------------------------|--------------------------------|---------------------------------|
| Tubule Injury/Repair              | 1.37 (1.13, 1.64)                | 1.36 (1.11, 1.67)              | 1.14 (0.93, 1.40)               |
| Tubule Injury/Fibrosis            | 1.36 (1.04, 1.78)                | 1.29 (0.99, 1.89)              | 1.10 (0.83, 1.45)               |
| Tubule Reabsorption               | 1.95 (1.57, 2.41)                | 1.85 (1.48, 2.31)              | 1.21 (0.95, 1.56)               |
| Tubule Reserve/Mineral Metabolism | 1.78 (1.47, 2.17)                | 1.65 (1.35, 2.01)              | 1.04 (0.81, 1.35)               |
| Albumin-creatinine ratio          | 2.26 (1.88, 2.72)                | 2.10 (1.73, 2.56)              | 1.75 (1.41, 2.17)               |

\* model 1: age, sex, race, randomization arm, SBP, DBP, number of antihypertensive meds, ACEi or ARB use, diuretic use, history of CVD or HF, current smoker, BMI, LDL, total cholesterol.  
 \*\* model 2: model 1 + baseline eGFR and UACR  
 Each factor is modeled per SD higher. ACR was log transformed and represents a SD higher on the log scale.
